# Supplementary material for: Absorption, Distribution, Metabolism, and Excretion of [14C]BS1801, a Selenium-Containing Drug Candidate, in Rats
Source: MDPI journal article supplement (doi:10.3390/molecules28248102), 2023-12-15
Supplement: s1 [file s1]

**Supplemental Table S1**

Study design.

| Group                     | Matrix collection                                                                                                                                                                                                                       | administration                                                                                          | Number and Gender          | Dosage |        |       | Time period or point in time for sample collection (h)                    |
|---------------------------|-----------------------------------------------------------------------------------------------------------------------------------------------------------------------------------------------------------------------------------------|---------------------------------------------------------------------------------------------------------|----------------------------|--------|--------|-------|---------------------------------------------------------------------------|
|                           |                                                                                                                                                                                                                                         |                                                                                                         |                            | mg/kg  | μCi/kg | mL/kg |                                                                           |
| Mass balance              | Urine and feces                                                                                                                                                                                                                         | PO                                                                                                      | 3 male and 3 female rats   | 100    | 100    | 10    | 0, 0-8, 8-24 (feces, 0-24), 24-48, 48-72, 72-96, 96-120, 120-144, 144-168 |
|                           | Bile                                                                                                                                                                                                                                    | PO                                                                                                      | 3 male and 3 female rats   | 100    | 100    | 10    | 0, 0-4, 4-8, 8-24, 24-48, 48-72                                           |
| Tissue distribution       | Brain, heart, lung, liver, stomach wall, spleen, kidney, muscle, colored fat, ovary, womb, testis, bladder wall, pancreas, small intestine wall, large intestine wall, eye, colored skin, thymus, spinal cord, marrow, plasma and blood | PO                                                                                                      | 12 male and 12 female rats | 100    | 100    | 10    | 2, 10, 48 and 96                                                          |
|                           | Plasma                                                                                                                                                                                                                                  | PO                                                                                                      | 3 male and 3 female rats   | 100    | 100    | 10    | 0.5, 2, 4, 6, 10, 12, 24, 48, 72 and 96                                   |
| Metabolite identification | Urine                                                                                                                                                                                                                                   | Urine, fecal and bile samples of metabolite identification study were obtained from mass balance study. |                            |        |        |       | 0, 0-8, 8-24, 24-48, 48-72 and 72-96                                      |
|                           | Feces                                                                                                                                                                                                                                   |                                                                                                         |                            |        |        |       | 0, 0-24, 24-48                                                            |
|                           | Bile                                                                                                                                                                                                                                    |                                                                                                         |                            |        |        |       | 0, 0-4, 4-8, 8-24 and 24-48                                               |

# Supplemental Table S2

Mean cumulative dose recovery in urine, feces, urine + feces, and bile following a single oral administration of [<sup>14</sup>C]BS1801 at the dose of 100 mg/kg (100 µCi/kg) to SD rats.

| Time (h) | Urine (%)     |                 |       | Feces (%)     |                 |       | Urine + Feces (%) |                 |       | Bile (%)      |                 |       |
|----------|---------------|-----------------|-------|---------------|-----------------|-------|-------------------|-----------------|-------|---------------|-----------------|-------|
|          | Male<br>(n=3) | Female<br>(n=3) | Mean  | Male<br>(n=3) | Female<br>(n=3) | Mean  | Male<br>(n=3)     | Female<br>(n=3) | Mean  | Male<br>(n=3) | Female<br>(n=3) | Mean  |
| 0        | 0.00          | 0.00            | 0.00  | 0.00          | 0.00            | 0.00  | 0.00              | 0.00            | 0.00  | 0.00          | 0.00            | 0.00  |
| 0 - 4    | -             | -               | -     | -             | -               | -     | -                 | -               | -     | 0.12          | 0.034           | 0.077 |
| 0 - 8    | 0.028         | 0.051           | 0.039 | -             | -               | -     | 0.028             | 0.051           | 0.039 | 0.23          | 0.073           | 0.15  |
| 0 - 24   | 0.19          | 0.26            | 0.22  | 83.68         | 76.51           | 80.10 | 83.87             | 76.77           | 80.32 | 0.50          | 0.16            | 0.33  |
| 0 - 48   | 0.36          | 0.46            | 0.41  | 90.65         | 91.67           | 91.16 | 91.02             | 92.13           | 91.57 | 0.85          | 0.19            | 0.52  |
| 0 - 72   | 0.45          | 0.58            | 0.52  | 91.65         | 92.84           | 92.24 | 92.10             | 93.42           | 92.76 | 0.98          | 0.19            | 0.58  |
| 0 - 96   | 0.49          | 0.67            | 0.58  | 91.98         | 93.03           | 92.50 | 92.47             | 93.69           | 93.08 | -             | -               | -     |
| 0 - 120  | 0.51          | 0.70            | 0.61  | 92.13         | 93.11           | 92.62 | 92.64             | 93.82           | 93.23 | -             | -               | -     |
| 0 - 144  | 0.51          | 0.72            | 0.61  | 92.23         | 93.16           | 92.70 | 92.74             | 93.87           | 93.31 | -             | -               | -     |
| 0 - 168  | 0.51          | 0.73            | 0.62  | 92.32         | 93.22           | 92.77 | 92.83             | 93.95           | 93.39 | -             | -               | -     |

-, no sample

### Supplemental Table S3

AUC<sub>0-96h</sub> of radioactivity in tissues and plasma of rats, and their ratio to plasma following a single oral administration of [<sup>14</sup>C]BS1801 at the dose of 100 mg/kg (100 µCi/kg).

| Tissue          | Male (n=3)               |         |         |         | Female (n=3)                         |       |         |                          |          |         |         |                                      |       |         |
|-----------------|--------------------------|---------|---------|---------|--------------------------------------|-------|---------|--------------------------|----------|---------|---------|--------------------------------------|-------|---------|
|                 | concentration (ng eq./g) |         |         |         | AUC <sub>0-96h</sub><br>(ng eq.×h/g) | R     | P       | concentration (ng eq./g) |          |         |         | AUC <sub>0-96h</sub><br>(ng eq.×h/g) | R     | P       |
|                 | 2 h                      | 10 h    | 48 h    | 96 h    |                                      |       |         | 2 h                      | 10 h     | 48 h    | 96 h    |                                      |       |         |
| Brain           | 160.94                   | 216.40  | 133.81  | 0.00    | 11535.82                             | 0.36  | 0.00%   | 68.68                    | 197.20   | 135.42  | 0.00    | 10702.14                             | 0.17  | 0.00%   |
| Heart           | 439.95                   | 629.04  | 328.01  | 174.46  | 34959.16                             | 1.08  | 27.73%  | 489.96                   | 1187.56  | 390.52  | 253.84  | 52648.10                             | 0.82  | 21.37%  |
| Lung            | 1446.42                  | 1223.73 | 586.70  | 312.38  | 68102.97                             | 2.11  | 21.60%  | 1100.89                  | 1443.91  | 638.94  | 450.63  | 77003.61                             | 1.19  | 31.21%  |
| Liver           | 4412.92                  | 9147.10 | 2872.73 | 1042.46 | 380994.58                            | 11.80 | 11.40%  | 4607.42                  | 9895.21  | 3393.12 | 1188.76 | 425061.50                            | 6.59  | 12.01%  |
| Kidney          | 1096.95                  | 2106.07 | 787.40  | 340.64  | 95957.87                             | 2.97  | 16.17%  | 1177.14                  | 2357.26  | 1006.17 | 613.60  | 118094.03                            | 1.83  | 26.03%  |
| Muscle          | 371.83                   | 521.44  | 280.55  | 151.45  | 29550.72                             | 0.91  | 29.04%  | 334.00                   | 956.79   | 312.71  | 270.20  | 43607.69                             | 0.68  | 28.24%  |
| Stomach         | 43159.64                 | 4868.26 | 289.62  | 96.10   | 342528.31                            | 10.60 | 0.22%   | 25902.89                 | 1929.12  | 338.68  | 199.96  | 193246.66                            | 3.00  | 0.77%   |
| Spleen          | 375.64                   | 947.74  | 281.98  | 79.25   | 37703.20                             | 1.17  | 8.36%   | 459.40                   | 963.82   | 368.19  | 182.97  | 44688.48                             | 0.69  | 18.98%  |
| Fat             | 520.91                   | 1038.13 | 485.15  | 208.75  | 52352.90                             | 1.62  | 20.11%  | 659.49                   | 1158.63  | 404.15  | 261.36  | 53597.12                             | 0.83  | 22.56%  |
| Bladder         | 565.26                   | 989.51  | 493.52  | 457.33  | 57782.40                             | 1.79  | 46.22%  | 676.64                   | 1336.37  | 550.28  | 374.07  | 66759.38                             | 1.04  | 27.99%  |
| Pancreas        | 392.43                   | 1650.33 | 252.62  | 128.20  | 53859.46                             | 1.67  | 7.77%   | 488.14                   | 1169.65  | 369.22  | 213.47  | 50342.31                             | 0.78  | 18.25%  |
| Small intestine | 1235.98                  | 2294.33 | 516.38  | 199.51  | 85942.05                             | 2.66  | 8.70%   | 885.21                   | 2145.95  | 556.20  | 391.31  | 87091.12                             | 1.35  | 18.24%  |
| Large intestine | 505.96                   | 7359.03 | 1512.19 | 198.78  | 241582.38                            | 7.48  | 2.70%   | 534.35                   | 45862.73 | 479.21  | 253.54  | 1084205.80                           | 16.82 | 0.55%   |
| Eye             | 436.21                   | 1498.60 | 1877.18 | 2314.26 | 172909.82                            | 5.35  | 100.00% | 559.15                   | 1581.33  | 1724.34 | 1674.09 | 153491.05                            | 2.38  | 97.09%  |
| Skin            | 740.91                   | 886.34  | 454.92  | 245.58  | 49545.97                             | 1.53  | 27.71%  | 686.62                   | 1289.98  | 512.19  | 524.41  | 67712.47                             | 1.05  | 40.65%  |
| Thymus          | 480.75                   | 666.53  | 383.18  | 226.15  | 39638.48                             | 1.23  | 33.93%  | 624.36                   | 883.64   | 489.33  | 441.56  | 55083.86                             | 0.85  | 49.97%  |
| Spinal cord     | 7240.81                  | 3491.23 | 911.95  | 0.00    | 155716.12                            | 4.82  | 0.00%   | 4123.23                  | 2397.65  | 478.43  | 4294.41 | 199400.34                            | 3.09  | 100.00% |
| Marrow          | 197.43                   | 182.94  | 739.41  | 95.75   | 39287.33                             | 1.22  | 12.95%  | 208.61                   | 121.03   | 117.17  | 7.09    | 9035.22                              | 0.14  | 3.40%   |
| Plasma          | 676.02                   | 659.11  | 241.95  | 139.90  | 32301.05                             | 1.00  | 20.70%  | 907.77                   | 1698.81  | 386.69  | 176.30  | 64470.34                             | 1.00  | 10.38%  |
| Blood           | 336.15                   | 565.24  | 165.18  | 70.76   | 23482.33                             | 0.73  | 12.52%  | 285.94                   | 635.22   | 282.53  | 25.14   | 28791.98                             | 0.45  | 3.96%   |

| Tissue | Male (n=3)               |        |        |        |                                      |      |        | Female (n=3)             |         |        |        |                                      |      |        |
|--------|--------------------------|--------|--------|--------|--------------------------------------|------|--------|--------------------------|---------|--------|--------|--------------------------------------|------|--------|
|        | concentration (ng eq./g) |        |        |        | AUC <sub>0-96h</sub><br>(ng eq.×h/g) | R    | P      | concentration (ng eq./g) |         |        |        | AUC <sub>0-96h</sub><br>(ng eq.×h/g) | R    | P      |
|        | 2 h                      | 10 h   | 48 h   | 96 h   |                                      |      |        | 2 h                      | 10 h    | 48 h   | 96 h   |                                      |      |        |
| Testis | 476.61                   | 706.30 | 360.34 | 250.29 | 40129.68                             | 1.24 | 35.44% | -                        | -       | -      | -      | -                                    | -    | -      |
| Ovary  | -                        | -      | -      | -      | -                                    | -    | -      | 846.37                   | 3554.21 | 790.70 | 803.17 | 139254.86                            | 2.16 | 22.60% |
| Womb   | -                        | -      | -      | -      | -                                    | -    | -      | 761.65                   | 1430.80 | 779.07 | 554.56 | 83525.91                             | 1.30 | 38.76% |

AUC<sub>0-96h</sub>, Area under the tissue concentration-time curve from time 0 to 96 h; R, The ratio of AUC<sub>0-96h</sub> in tissue to that in plasma; P, The ratio of concentration at 96 h to  $C_{max}$  in tissue; -, no sample.

# Supplemental Table S4

Information of BS1801 and its metabolites detected in rat plasma, urine, feces, and bile by using UHPLC-Q Exactive Plus MS.

| ID               | Pathway                                    | Formula                                                                         | [M+H] <sup>+</sup> <i>m/z</i> (determined) | Mass error (ppm) | Fragment ions                                             |
|------------------|--------------------------------------------|---------------------------------------------------------------------------------|--------------------------------------------|------------------|-----------------------------------------------------------|
| BS1801           | Parent drug                                | C <sub>18</sub> H <sub>16</sub> N <sub>2</sub> O <sub>2</sub> Se <sub>2</sub>   | 452.9617                                   | -1.8             | 254.0078, 211.9608, 199.9608, 184.9501, 70.0658           |
| BS1801-M484 (M2) | 2[2H]+2[CH <sub>2</sub> ]                  | C <sub>20</sub> H <sub>24</sub> N <sub>2</sub> O <sub>2</sub> Se <sub>2</sub>   | 485.0242                                   | 0.2              | 270.0394, 198.9656, 183.9416, 72.0815                     |
| M232             | M484-2+amide hydrolysis                    | C <sub>8</sub> H <sub>8</sub> O <sub>3</sub> Se                                 | 232.9713                                   | 0.9              | 214.9604, 199.9370                                        |
| M267             | M286-NH <sub>3</sub> +[-2H]                | C <sub>12</sub> H <sub>13</sub> NOSe                                            | 268.0237                                   | 0.7              | 198.9656, 170.9707, 92.9244                               |
| M286             | 2[2H]+2[CH <sub>2</sub> ]+amide hydrolysis | C <sub>12</sub> H <sub>18</sub> N <sub>2</sub> OSe                              | 287.0660                                   | 1.0              | 270.0391, 198.9655, 72.0815                               |
| M301-1           | M286+oxidative deamination+[O]+[-2H]       | C <sub>12</sub> H <sub>15</sub> NO <sub>3</sub> Se                              | 302.0290                                   | 0.0              | 198.9655, 183.9421, 86.0602                               |
| M301-2           | M286+oxidative deamination+[O]+[-2H]       | C <sub>12</sub> H <sub>15</sub> NO <sub>3</sub> Se                              | 302.0290                                   | 0.0              | 198.9656, 183.9417, 86.0603                               |
| M315             | M301+[CH <sub>2</sub> ]                    | C <sub>13</sub> H <sub>17</sub> NO <sub>3</sub> Se                              | 316.0447                                   | 0.3              | 284.0182, 198.9656, 183.9426                              |
| M468             | [O]                                        | C <sub>18</sub> H <sub>16</sub> N <sub>2</sub> O <sub>3</sub> Se <sub>2</sub>   | 468.9552                                   | -2.6             | 450.9494, 251.9922, 211.9610, 200.9450, 184.9500, 70.0659 |
| M484-2           | M468+[2H]+[CH <sub>2</sub> ]               | C <sub>19</sub> H <sub>20</sub> N <sub>2</sub> O <sub>3</sub> Se <sub>2</sub>   | 484.9880                                   | 0.6              | 466.9773, 254.0075, 214.9604, 199.9370, 92.9243           |
| M500             | BS1801-M484+[O]                            | C <sub>20</sub> H <sub>24</sub> N <sub>2</sub> O <sub>3</sub> Se <sub>2</sub>   | 501.0192                                   | 0.4              | 483.0082, 254.0079, 214.9604, 198.9657, 92.9243           |
| M532             | M500+2[O]                                  | C <sub>20</sub> H <sub>24</sub> N <sub>2</sub> O <sub>5</sub> Se <sub>2</sub>   | 533.0091                                   | 0.6              | 514.9987, 496.9887, 230.9554, 214.9605, 198.9656, 92.9243 |
| M596             | M500+[O]+[SO <sub>3</sub> ]                | C <sub>20</sub> H <sub>24</sub> N <sub>2</sub> O <sub>7</sub> Se <sub>2</sub> S | 596.9709                                   | 0.3              | 517.0143, 499.0034, 286.0336, 254.0079, 214.9604          |
| M603             | BS1801-M484+[Cys]                          | C <sub>23</sub> H <sub>29</sub> N <sub>3</sub> O <sub>4</sub> Se <sub>2</sub> S | 604.0291                                   | 1.5              | 514.9796, 287.0655, 270.0389, 230.9376, 198.9655, 72.0815 |
| M646             | 2[2H]+[CH <sub>2</sub> ]+[GluA]            | C <sub>25</sub> H <sub>30</sub> N <sub>2</sub> O <sub>8</sub> Se <sub>2</sub>   | 647.0406                                   | 0.2              | 471.0084, 287.0655, 270.0389, 198.9655, 72.0815           |
| M676             | M500+[GluA]                                | C <sub>26</sub> H <sub>32</sub> N <sub>2</sub> O <sub>9</sub> Se <sub>2</sub>   | 677.0506                                   | -0.7             | 501.0191, 286.0338, 270.0385, 214.9604, 198.9655, 72.0815 |

The HR-MS and HR-MS<sup>2</sup> acquisition tests were performed using a Vanquish UHPLC system coupled with a Q Exactive Plus mass spectrometer equipped with an ESI source.

All possible metabolites were input into the inclusion list, and the MS/MS data were acquired when the target *m/z* ions were detected.

[CH<sub>2</sub>], methylation; [Cys], cysteine conjugation; [GluA], glucuronidation; [2H], hydrogenation; [O], oxidation; [SO<sub>3</sub>], sulfation.

### Supplemental Table S5

The distribution of radioactivity from BS1801 and its major metabolites in rat plasma, urine, feces, and bile and the percent of dose in urine and feces (%).

| ID               | Retention time (min) |                    | Plasma (%AUC) |       | Urine (%Dose)       |                     | Feces (%Dose)        |                      | Bile (%Dose)        |                     | Urine + Feces (%Dose) |                      |
|------------------|----------------------|--------------------|---------------|-------|---------------------|---------------------|----------------------|----------------------|---------------------|---------------------|-----------------------|----------------------|
|                  | M                    | F                  | M             | F     | M: 0.51%<br>of dose | F: 0.73%<br>of dose | M: 92.32%<br>of dose | F: 93.22%<br>of dose | M: 0.98%<br>of dose | F: 0.19%<br>of dose | M: 92.83%<br>of dose  | F: 93.95%<br>of dose |
| BS1801           | 18.10                | 17.88              | -             | -     | -                   | -                   | 76.97                | 81.89                | -                   | -                   | 76.97                 | 81.89                |
| BS1801-M484 (M2) | 22.33                | 22.17              | 65.41         | 81.33 | -                   | -                   | -                    | -                    | -                   | -                   | -                     | -                    |
| M286             | 5.22                 | 4.90               | -             | -     | -                   | 0.20                | -                    | -                    | 0.084               | -                   | -                     | 0.20                 |
| M301-1           | 8.38                 | -                  | -             | -     | -                   | -                   | -                    | -                    | 0.22                | -                   | -                     | -                    |
| M301-2           | 8.78                 | 8.57               | -             | -     | 0.41                | 0.21                | -                    | -                    | -                   | -                   | 0.41                  | 0.21                 |
| M267             | 8.93                 | 8.90 <sup>a</sup>  | -             | -     | -                   | -                   | -                    | -                    | 0.46                | 0.088 <sup>a</sup>  | -                     | -                    |
| M532             | -                    | -                  | -             | -     | -                   | -                   | -                    | -                    | -                   | -                   | -                     | -                    |
| M596             | 10.78 <sup>a</sup>   | 10.35 <sup>a</sup> | -             | -     | -                   | -                   | -                    | -                    | 0.18 <sup>a</sup>   | 0.081 <sup>a</sup>  | -                     | -                    |
| M646             | -                    | -                  | -             | -     | -                   | -                   | -                    | -                    | -                   | -                   | -                     | -                    |
| M484-2           | 11.28                | -                  | -             | -     | -                   | -                   | 4.00                 | -                    | -                   | -                   | 4.00                  | -                    |
| M232             | 11.67-11.93          | 11.60              | 11.59         | -     | 0.018               | 0.23                | -                    | -                    | -                   | -                   | 0.018                 | 0.23                 |
| M676             | 12.25                | 12.98              | -             | -     | -                   | -                   | -                    | -                    | 0.022               | 0.018               | -                     | -                    |
| M315             | 12.85                | 12.18              | -             | -     | 0.068               | 0.046               | -                    | -                    | -                   | -                   | 0.068                 | 0.046                |
| M500             | 13.17-13.42          | 12.83              | 20.07         | 14.00 | -                   | -                   | 5.73                 | -                    | -                   | -                   | 5.73                  | -                    |
| M603             | -                    | 15.17              | -             | -     | -                   | -                   | -                    | -                    | -                   | 0.0028              | -                     | -                    |
| M468             | -                    | 17.57              | -             | -     | -                   | -                   | -                    | 7.77                 | -                   | -                   | -                     | 7.77                 |

M, male SD rat; F, female SD rat; %AUC is derived from the AUC<sub>0-72h</sub> pooled plasma; %Dose is derived from 0-168 h of urine and feces excretion data; -, no obvious radioactive peak in radio-chromatogram; <sup>a</sup>, co-eluted.
